# Supplementary material for: A quest for stable 2,5-bis(halobora)cyclopentenylidene and its Si, Ge, Sn and Pb analogs at theoretical levels
Source: Royal Society of Chemistry journal article supplement (doi:10.1039/c5ra04911c), 2015-01-01
Supplement: c5ra04911c1.pdf [file c5ra04911c1.pdf]

In the abbreviation for the names of divalent species under study the number **1**, **2**, **3**, **4**, and **5** stand for carbenes, silylenes, germylenes, stannylenes, and plumbylenes respectively. The subscripts s, t, and X refer to singlet, triplet, and halogen atoms (X=F, Cl, Br, I).

**Table 1** Calculated total bonding energies (E) and the  $\Delta E_{st}$  for the two series of BHEs (**1**<sub>s-X</sub> vs. **1**<sub>t-X</sub>, **2**<sub>s-X</sub> vs. **2**<sub>t-X</sub>, **3**<sub>s-X</sub> vs. **3**<sub>t-X</sub>, **4**<sub>s-X</sub> vs. **4**<sub>t-X</sub> and **5**<sub>s-X</sub> vs. **5**<sub>t-X</sub> with X =F, Cl, Br and I) at UB3LYP/TZ2P.

| Compound<br>( <i>Singlets</i> ) | E<br>(kcal/mol) | Compound<br>( <i>Triplets</i> ) | E<br>(kcal/mol) | $\Delta E_{st}$ |
|---------------------------------|-----------------|---------------------------------|-----------------|-----------------|
| <b>1</b> <sub>s-F</sub>         | -1235.67        | <b>1</b> <sub>t-F</sub>         | -1235.16        | 0.51            |
| <b>1</b> <sub>s-Cl</sub>        | -1140.16        | <b>1</b> <sub>t-Cl</sub>        | -1135.87        | 4.29            |
| <b>1</b> <sub>s-Br</sub>        | -1108.12        | <b>1</b> <sub>t-Br</sub>        | -1103.27        | 4.85            |
| <b>1</b> <sub>s-I</sub>         | -1082.42        | <b>1</b> <sub>t-I</sub>         | -1076.84        | 5.58            |
| <b>2</b> <sub>s-F</sub>         | -1177.12        | <b>2</b> <sub>t-F</sub>         | -1154.34        | 22.78           |
| <b>2</b> <sub>s-Cl</sub>        | -1084.06        | <b>2</b> <sub>t-Cl</sub>        | -1056.88        | 27.18           |
| <b>2</b> <sub>s-Br</sub>        | -1052.31        | <b>2</b> <sub>t-Br</sub>        | -1024.51        | 27.80           |
| <b>2</b> <sub>s-I</sub>         | -1028.21        | <b>2</b> <sub>t-I</sub>         | -999.07         | 29.14           |
| <b>3</b> <sub>s-F</sub>         | -1164.15        | <b>3</b> <sub>t-F</sub>         | -1140.29        | 23.86           |
| <b>3</b> <sub>s-Cl</sub>        | -1070.56        | <b>3</b> <sub>t-Cl</sub>        | -1042.44        | 28.12           |
| <b>3</b> <sub>s-Br</sub>        | -1038.73        | <b>3</b> <sub>t-Br</sub>        | -1010.03        | 28.70           |
| <b>3</b> <sub>s-I</sub>         | -1014.81        | <b>3</b> <sub>t-I</sub>         | -984.75         | 30.06           |
| <b>4</b> <sub>s-F</sub>         | -1144.49        | <b>4</b> <sub>t-F</sub>         | -1122.5         | 21.99           |
| <b>4</b> <sub>s-Cl</sub>        | -1051.19        | <b>4</b> <sub>t-Cl</sub>        | -1024.4         | 26.79           |
| <b>4</b> <sub>s-Br</sub>        | -1019.57        | <b>4</b> <sub>t-Br</sub>        | -992.10         | 27.47           |
| <b>4</b> <sub>s-I</sub>         | -996.04         | <b>4</b> <sub>t-I</sub>         | -967.19         | 28.85           |
| <b>5</b> <sub>s-F</sub>         | -1169.09        | <b>5</b> <sub>t-F</sub>         | -1141.69        | 27.40           |
| <b>5</b> <sub>s-Cl</sub>        | -1075.24        | <b>5</b> <sub>t-Cl</sub>        | -1040.45        | 34.79           |
| <b>5</b> <sub>s-Br</sub>        | -1034.96        | <b>5</b> <sub>t-Br</sub>        | -1001.00        | 33.96           |
| <b>5</b> <sub>s-I</sub>         | -1018.44        | <b>5</b> <sub>t-I</sub>         | -978.46         | 39.98           |

**Table 2** Calculated bonding energies (E) and the  $\Delta E_{st}$  for the two series of BHEs ( $\mathbf{1}_{s-X}$  vs.  $\mathbf{1}_{t-X}$ ,  $\mathbf{2}_{s-X}$  vs.  $\mathbf{2}_{t-X}$ ,  $\mathbf{3}_{s-X}$  vs.  $\mathbf{3}_{t-X}$ ,  $\mathbf{4}_{s-X}$  vs.  $\mathbf{4}_{t-X}$  and  $\mathbf{5}_{s-X}$  vs.  $\mathbf{5}_{t-X}$  with X =F, Cl, Br and I) at MP2/6-311++g\*\*.

| Compound<br>( <i>Singlets</i> ) | E<br>(hartree) | Compound<br>( <i>Triplets</i> ) | E<br>(hartree) | $\Delta E_{st}$<br>(kcal/mol) |
|---------------------------------|----------------|---------------------------------|----------------|-------------------------------|
| $\mathbf{1}_{s-F}$              | -363.52        | $\mathbf{1}_{t-F}$              | -363.52        | 2.89                          |
| $\mathbf{1}_{s-Cl}$             | -193.86        | $\mathbf{1}_{t-Cl}$             | -193.85        | 7.29                          |
| $\mathbf{1}_{s-Br}$             | -190.28        | $\mathbf{1}_{t-Br}$             | -190.27        | 8.95                          |
| $\mathbf{1}_{s-I}$              | -186.72        | $\mathbf{1}_{t-I}$              | -186.70        | 11.55                         |
| <br>                            |                |                                 |                |                               |
| $\mathbf{2}_{s-F}$              | -329.43        | $\mathbf{2}_{t-F}$              | -329.41        | 16.96                         |
| $\mathbf{2}_{s-Cl}$             | -159.77        | $\mathbf{2}_{t-Cl}$             | -159.74        | 21.06                         |
| $\mathbf{2}_{s-Br}$             | -156.20        | $\mathbf{2}_{t-Br}$             | -156.16        | 22.80                         |
| $\mathbf{2}_{s-I}$              | -152.64        | $\mathbf{2}_{t-I}$              | -152.60        | 25.38                         |
| <br>                            |                |                                 |                |                               |
| $\mathbf{3}_{s-F}$              | -329.34        | $\mathbf{3}_{t-F}$              | -329.30        | 24.52                         |
| $\mathbf{3}_{s-Cl}$             | -159.68        | $\mathbf{3}_{t-Cl}$             | -159.63        | 28.54                         |
| $\mathbf{3}_{s-Br}$             | -156.11        | $\mathbf{3}_{t-Br}$             | -156.06        | 30.24                         |
| $\mathbf{3}_{s-I}$              | -152.55        | $\mathbf{3}_{t-I}$              | -152.49        | 32.81                         |
| <br>                            |                |                                 |                |                               |
| $\mathbf{4}_{s-F}$              | -328.95        | $\mathbf{4}_{t-F}$              | -328.91        | 29.07                         |
| $\mathbf{4}_{s-Cl}$             | -159.29        | $\mathbf{4}_{t-Cl}$             | -159.24        | 33.06                         |
| $\mathbf{4}_{s-Br}$             | -155.72        | $\mathbf{4}_{t-Br}$             | -155.64        | 49.80                         |
| $\mathbf{4}_{s-I}$              | -152.16        | $\mathbf{4}_{t-I}$              | -152.08        | 49.06                         |
| <br>                            |                |                                 |                |                               |
| $\mathbf{5}_{s-F}$              | -329.05        | $\mathbf{5}_{t-F}$              | -328.98        | 40.70                         |
| $\mathbf{5}_{s-Cl}$             | -159.39        | $\mathbf{5}_{t-Cl}$             | -159.32        | 44.53                         |
| $\mathbf{5}_{s-Br}$             | -155.82        | $\mathbf{5}_{t-Br}$             | -155.74        | 51.11                         |
| $\mathbf{5}_{s-I}$              | -152.26        | $\mathbf{5}_{t-I}$              | -152.18        | 51.07                         |

**Table 3** Calculated sum of electronic and thermal free energies (E), zero-point vibrational energy (ZPVE), and the  $\Delta E_{st}$  (in kcal/mol) for the two series of BHEs ( $\mathbf{1}_{s-X}$  vs.  $\mathbf{1}_{t-X}$ ,  $\mathbf{2}_{s-X}$  vs.  $\mathbf{2}_{t-X}$ ,  $\mathbf{3}_{s-X}$  vs.  $\mathbf{3}_{t-X}$ ) with X =F, Cl and Br) at CBS-QB3.

| Compound<br>( <i>Singlets</i> ) | E<br>(Hartree) | ZPVE<br>(kcal/mol) | Compound<br>( <i>Triplets</i> ) | E<br>(kcal/mol) | ZPVE<br>(kcal/mol) | $\Delta E_{st}$ |
|---------------------------------|----------------|--------------------|---------------------------------|-----------------|--------------------|-----------------|
| $\mathbf{1}_{s-F}$              | -364.98        | 31.04              | $\mathbf{1}_{t-F}$              | -364.98         | 31.27              | 1.42            |
| $\mathbf{1}_{s-Cl}$             | -1085.67       | 29.16              | $\mathbf{1}_{t-Cl}$             | -1085.66        | 29.34              | 4.32            |
| $\mathbf{1}_{s-Br}$             | -5313.49       | 28.51              | $\mathbf{1}_{t-Br}$             | -5313.48        | 28.66              | 4.93            |
| $\mathbf{1}_{s-I}$              | ---            | ---                | $\mathbf{1}_{t-I}$              | ---             | ---                | ---             |
| $\mathbf{2}_{s-F}$              | -616.43        | 28.85              | $\mathbf{2}_{t-F}$              | -616.40         | 29.08              | 18.81           |
| $\mathbf{2}_{s-Cl}$             | -1337.12       | 27.16              | $\mathbf{2}_{t-Cl}$             | -1337.09        | 27.31              | 21.61           |
| $\mathbf{2}_{s-Br}$             | -5564.95       | 26.51              | $\mathbf{2}_{t-Br}$             | -5564.91        | 26.63              | 22.21           |
| $\mathbf{2}_{s-I}$              | ---            | ---                | $\mathbf{2}_{t-I}$              | ---             | ---                | ---             |
| $\mathbf{3}_{s-F}$              | -2403.95       | 28.44              | $\mathbf{3}_{t-F}$              | -2403.92        | 28.63              | 21.68           |
| $\mathbf{3}_{s-Cl}$             | -3124.64       | 26.74              | $\mathbf{3}_{t-Cl}$             | -3124.60        | 26.84              | 24.73           |
| $\mathbf{3}_{s-Br}$             | -7352.47       | 26.09              | $\mathbf{3}_{t-Br}$             | -7352.43        | 26.15              | 25.38           |
| $\mathbf{3}_{s-I}$              | ---            | ---                | $\mathbf{3}_{t-I}$              | ---             | ---                | ---             |

**Table 4** Calculated sum of electronic and thermal free energies (E), zero-point vibrational energy (ZPVE), and the  $\Delta E_{st}$  (in kcal/mol) for the two series of BHEs ( $\mathbf{1}_{s-X}$  vs.  $\mathbf{1}_{t-X}$ ,  $\mathbf{2}_{s-X}$  vs.  $\mathbf{2}_{t-X}$ ,  $\mathbf{3}_{s-X}$  vs.  $\mathbf{3}_{t-X}$ ) with X =F, Cl and Br) at G4MP2.

| Compound<br>( <i>Singlets</i> ) | E<br>(Hartree) | ZPVE<br>(kcal/mol) | Compound<br>( <i>Triplets</i> ) | E<br>(kcal/mol) | ZPVE<br>(kcal/mol) | $\Delta E_{st}$ |
|---------------------------------|----------------|--------------------|---------------------------------|-----------------|--------------------|-----------------|
| $\mathbf{1}_{s-F}$              | -364.90        | 31.22              | $\mathbf{1}_{t-F}$              | -364.90         | 31.44              | 2.52            |
| $\mathbf{1}_{s-Cl}$             | -1085.58       | 29.24              | $\mathbf{1}_{t-Cl}$             | -1085.58        | 29.41              | 5.02            |
| $\mathbf{1}_{s-Br}$             | -5312.92       | 28.63              | $\mathbf{1}_{t-Br}$             | -5312.91        | 28.76              | 5.71            |
| $\mathbf{1}_{s-I}$              | ---            | ---                | $\mathbf{1}_{t-I}$              | ---             | ---                | ---             |
| $\mathbf{2}_{s-F}$              | -616.34        | 29.14              | $\mathbf{2}_{t-F}$              | -616.31         | 29.32              | 19.99           |
| $\mathbf{2}_{s-Cl}$             | -1337.03       | 27.28              | $\mathbf{2}_{t-Cl}$             | -1336.99        | 27.38              | 22.49           |
| $\mathbf{2}_{s-Br}$             | -5564.37       | 26.65              | $\mathbf{2}_{t-Br}$             | -5564.33        | 26.73              | 23.25           |
| $\mathbf{2}_{s-I}$              | ---            | ---                | $\mathbf{2}_{t-I}$              | ---             | ---                | ---             |
| $\mathbf{3}_{s-F}$              | -2403.64       | 28.73              | $\mathbf{3}_{t-F}$              | -2403.60        | 28.90              | 22.12           |
| $\mathbf{3}_{s-Cl}$             | -3124.32       | 26.85              | $\mathbf{3}_{t-Cl}$             | -3124.28        | 26.94              | 25.09           |
| $\mathbf{3}_{s-Br}$             | -7351.66       | 26.23              | $\mathbf{3}_{t-Br}$             | -7351.62        | 26.26              | 25.93           |
| $\mathbf{3}_{s-I}$              | ---            | ---                | $\mathbf{3}_{t-I}$              | ---             | ---                | ---             |

**Table 5** Comparison between the stability of our divalent species ( $BH\ddot{E}s$ :  $1_X$ - $3_X$ ) with their corresponding Arduengo's ( $NH\ddot{E}s$ ) by considering their energy differences,  $\delta(\Delta E_{st}) = (\Delta E_{st}^{NHEs} - \Delta E_{st}^{BHEs})$ , (in kcal/mol) at G4MP2.

| X  | $1_X$ | $2_X$ | $3_X$ |
|----|-------|-------|-------|
| F  | ---   | 14.04 | 8.72  |
| Cl | 23.34 | 1.19  | -4.56 |
| Br | 16.25 | -4.65 | -9.86 |
| I  | ---   | ---   | ---   |

**Table 6** Calculated bond length (R1–R4) in Å, bond angles (A1–A3) and dihedral angles (D1) in Degree (°), for the two series of BHEs (**1**<sub>s-X</sub> vs. **1**<sub>t-X</sub>, **2**<sub>s-X</sub> vs. **2**<sub>t-X</sub>, **3**<sub>s-X</sub> vs. **3**<sub>t-X</sub>, **4**<sub>s-X</sub> vs. **4**<sub>t-X</sub> and **5**<sub>s-X</sub> vs. **5**<sub>t-X</sub> with X =F, Cl, Br and I) at UB3LYP/TZ2P.

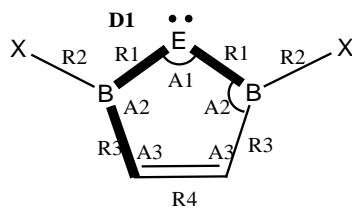

| Compound                 | R1    | R2    | R3    | R4    | B—B   | A1    | A2    | A3    | *D1  |
|--------------------------|-------|-------|-------|-------|-------|-------|-------|-------|------|
| <b>1</b> <sub>s-F</sub>  | 1.512 | 1.331 | 1.578 | 1.391 | 2.363 | 102.8 | 94.1  | 107.9 | 58.3 |
| <b>1</b> <sub>s-Cl</sub> | 1.503 | 1.757 | 1.577 | 1.390 | 2.343 | 102.4 | 93.1  | 108.0 | 61.0 |
| <b>1</b> <sub>s-Br</sub> | 1.500 | 1.929 | 1.575 | 1.391 | 2.348 | 102.5 | 93.5  | 107.5 | 60.2 |
| <b>1</b> <sub>s-I</sub>  | 1.495 | 2.144 | 1.571 | 1.390 | 2.286 | 99.7  | 94.5  | 106.6 | 61.4 |
| <b>1</b> <sub>t-F</sub>  | 1.547 | 1.336 | 1.587 | 1.378 | 2.510 | 108.4 | 104.9 | 110.9 | 0.0  |
| <b>1</b> <sub>t-Cl</sub> | 1.542 | 1.761 | 1.585 | 1.380 | 2.521 | 109.7 | 104.1 | 111.1 | 0.0  |
| <b>1</b> <sub>t-Br</sub> | 1.538 | 1.935 | 1.582 | 1.382 | 2.513 | 109.5 | 104.3 | 110.9 | 0.0  |
| <b>1</b> <sub>t-I</sub>  | 1.532 | 2.150 | 1.579 | 1.383 | 2.500 | 109.4 | 104.6 | 110.7 | 0.0  |
| <b>2</b> <sub>s-F</sub>  | 2.051 | 1.342 | 1.545 | 1.399 | 2.449 | 73.3  | 95.4  | 109.9 | 66.8 |
| <b>2</b> <sub>s-Cl</sub> | 2.041 | 1.766 | 1.533 | 1.406 | 2.395 | 71.9  | 92.7  | 108.8 | 72.1 |
| <b>2</b> <sub>s-Br</sub> | 2.037 | 1.940 | 1.530 | 1.407 | 2.387 | 71.1  | 93.5  | 108.7 | 71.1 |
| <b>2</b> <sub>s-I</sub>  | 2.027 | 2.158 | 1.526 | 1.409 | 2.313 | 69.6  | 94.7  | 107.2 | 71.3 |
| <b>2</b> <sub>t-F</sub>  | 2.037 | 1.338 | 1.584 | 1.371 | 2.868 | 89.5  | 107.1 | 118.2 | 0.0  |
| <b>2</b> <sub>t-Cl</sub> | 2.029 | 1.764 | 1.582 | 1.373 | 2.899 | 91.2  | 105.6 | 118.8 | 0.0  |
| <b>2</b> <sub>t-Br</sub> | 1.996 | 1.924 | 1.569 | 1.356 | 2.876 | 92.2  | 104.9 | 119.0 | 0.0  |
| <b>2</b> <sub>t-I</sub>  | 2.015 | 2.158 | 1.576 | 1.377 | 2.882 | 91.3  | 105.8 | 118.5 | 0.0  |
| <b>3</b> <sub>s-F</sub>  | 2.135 | 1.340 | 1.541 | 1.400 | 2.489 | 71.3  | 95.4  | 110.7 | 66.8 |
| <b>3</b> <sub>s-Cl</sub> | 2.128 | 1.765 | 1.529 | 1.407 | 2.451 | 70.3  | 92.7  | 110.0 | 71.5 |
| <b>3</b> <sub>s-Br</sub> | 2.122 | 1.959 | 1.526 | 1.406 | 2.451 | 70.5  | 93.0  | 110.0 | 71.1 |
| <b>3</b> <sub>s-I</sub>  | 2.112 | 2.157 | 1.523 | 1.410 | 2.363 | 68.0  | 94.4  | 108.2 | 71.2 |
| <b>3</b> <sub>t-F</sub>  | 2.093 | 1.335 | 1.584 | 1.37  | 2.918 | 88.4  | 106.6 | 119.2 | 0.0  |
| <b>3</b> <sub>t-Cl</sub> | 2.088 | 1.761 | 1.581 | 1.373 | 2.952 | 90.0  | 105.0 | 120.0 | 0.0  |
| <b>3</b> <sub>t-Br</sub> | 2.085 | 1.933 | 1.578 | 1.375 | 2.948 | 90.0  | 105.1 | 119.9 | 0.0  |
| <b>3</b> <sub>t-I</sub>  | 2.075 | 2.152 | 1.574 | 1.376 | 2.934 | 90.0  | 105.4 | 119.7 | 0.0  |
| <b>4</b> <sub>s-F</sub>  | 2.356 | 1.341 | 1.543 | 1.395 | 2.624 | 67.7  | 98.5  | 113.5 | 61.0 |
| <b>4</b> <sub>s-Cl</sub> | 2.345 | 1.765 | 1.527 | 1.406 | 2.565 | 66.3  | 94.7  | 112.3 | 68.0 |
| <b>4</b> <sub>s-Br</sub> | 2.343 | 1.960 | 1.524 | 1.409 | 2.581 | 66.8  | 94.7  | 112.6 | 67.8 |
| <b>4</b> <sub>s-I</sub>  | 2.332 | 2.205 | 1.518 | 1.412 | 2.452 | 63.3  | 96.3  | 110.0 | 68.9 |
| <b>4</b> <sub>t-F</sub>  | 2.313 | 1.335 | 1.585 | 1.370 | 3.041 | 82.2  | 107.1 | 121.5 | 0.0  |
| <b>4</b> <sub>t-Cl</sub> | 2.308 | 1.760 | 1.580 | 1.373 | 3.077 | 83.6  | 105.6 | 122.5 | 0.0  |
| <b>4</b> <sub>t-Br</sub> | 2.306 | 1.957 | 1.578 | 1.376 | 3.079 | 83.7  | 105.5 | 122.6 | 0.0  |
| <b>4</b> <sub>t-I</sub>  | 2.294 | 2.198 | 1.573 | 1.378 | 3.049 | 83.3  | 106.3 | 121.9 | 0.0  |
| <b>5</b> <sub>s-F</sub>  | 2.491 | 1.342 | 1.542 | 1.393 | 2.643 | 64.1  | 100.1 | 113.9 | 59.8 |
| <b>5</b> <sub>s-Cl</sub> | 2.477 | 1.769 | 1.527 | 1.402 | 2.586 | 62.9  | 97.6  | 113.3 | 66.2 |

|                          |       |       |       |       |       |      |       |       |      |
|--------------------------|-------|-------|-------|-------|-------|------|-------|-------|------|
| <b>S</b> <sub>s-Br</sub> | 2.473 | 1.945 | 1.525 | 1.404 | 2.585 | 63.0 | 97.6  | 112.8 | 64.9 |
| <b>S</b> <sub>s-I</sub>  | 2.461 | 2.211 | 1.518 | 1.408 | 2.482 | 60.6 | 98.7  | 110.7 | 65.8 |
| <b>S</b> <sub>t-F</sub>  | 2.394 | 1.335 | 1.583 | 1.370 | 3.101 | 80.7 | 106.5 | 123.1 | 0.0  |
| <b>S</b> <sub>t-Cl</sub> | 2.456 | 1.774 | 1.494 | 1.453 | 3.283 | 83.9 | 100.3 | 127.8 | 0.0  |
| <b>S</b> <sub>t-Br</sub> | 2.449 | 1.948 | 1.493 | 1.454 | 3.279 | 84.1 | 100.3 | 127.7 | 0.0  |
| <b>S</b> <sub>t-I</sub>  | 2.443 | 2.167 | 1.492 | 1.454 | 3.260 | 83.7 | 100.9 | 127.3 | 0.0  |

---

**Table 7** “Wiberg bond indices” (WBI) for the singlet BHEs (**1**<sub>s-X</sub>, **2**<sub>s-X</sub>, **3**<sub>s-X</sub>, **4**<sub>s-X</sub> and **5**<sub>s-X</sub> with X = H, F, Cl, Br and I) at B3LYP/TZ2P.

|                       | $\ddot{\text{E}}-\text{C}_{\text{DB}}$ | $\ddot{\text{E}}-\parallel^{\text{a}}$ | <b>B—B</b> | <b>C=C</b> | $\ddot{\text{E}}-\text{B}$ | <b>B-C<sub>DB</sub></b> | <b>X-B</b> |
|-----------------------|----------------------------------------|----------------------------------------|------------|------------|----------------------------|-------------------------|------------|
| <b>1<sub>F</sub></b>  | 0.249                                  | 0.498                                  | 0.105      | 1.674      | 1.191                      | 0.911                   | 0.871      |
| <b>1<sub>Cl</sub></b> | 0.248                                  | 0.496                                  | 0.114      | 1.672      | 1.225                      | 0.933                   | 1.147      |
| <b>1<sub>Br</sub></b> | 0.247                                  | 0.494                                  | 0.113      | 1.671      | 1.237                      | 0.935                   | 1.146      |
| <b>1<sub>I</sub></b>  | 0.236                                  | 0.472                                  | 0.123      | 1.670      | 1.241                      | 0.940                   | 1.170      |
| <b>2<sub>F</sub></b>  | 0.197                                  | 0.394                                  | 0.235      | 1.605      | 0.963                      | 1.024                   | 0.845      |
| <b>2<sub>Cl</sub></b> | 0.200                                  | 0.400                                  | 0.278      | 1.558      | 0.933                      | 1.068                   | 1.151      |
| <b>2<sub>Br</sub></b> | 0.195                                  | 0.390                                  | 0.285      | 1.550      | 0.940                      | 1.070                   | 1.157      |
| <b>2<sub>I</sub></b>  | 0.188                                  | 0.376                                  | 0.322      | 1.536      | 0.933                      | 1.074                   | 1.196      |
| <b>3<sub>F</sub></b>  | 0.154                                  | 0.308                                  | 0.225      | 1.643      | 0.931                      | 1.026                   | 0.835      |
| <b>3<sub>Cl</sub></b> | 0.149                                  | 0.298                                  | 0.269      | 1.597      | 0.901                      | 1.072                   | 1.144      |
| <b>3<sub>Br</sub></b> | 0.147                                  | 0.294                                  | 0.279      | 1.583      | 0.903                      | 1.073                   | 1.151      |
| <b>3<sub>I</sub></b>  | 0.142                                  | 0.284                                  | 0.323      | 1.564      | 0.892                      | 1.078                   | 1.190      |
| <b>4<sub>F</sub></b>  | 0.123                                  | 0.246                                  | 0.214      | 1.669      | 0.890                      | 1.028                   | 0.822      |
| <b>4<sub>Cl</sub></b> | 0.127                                  | 0.254                                  | 0.269      | 1.600      | 0.840                      | 1.084                   | 1.139      |
| <b>4<sub>Br</sub></b> | 0.125                                  | 0.250                                  | 0.279      | 1.584      | 0.836                      | 1.085                   | 1.148      |
| <b>4<sub>I</sub></b>  | 0.125                                  | 0.250                                  | 0.343      | 1.553      | 0.811                      | 1.095                   | 1.192      |
| <b>5<sub>F</sub></b>  | ---                                    | ---                                    | ---        | ---        | ---                        | ---                     | ---        |
| <b>5<sub>Cl</sub></b> | 0.091                                  | 0.182                                  | 0.281      | 1.644      | 0.812                      | 1.074                   | 1.126      |
| <b>5<sub>Br</sub></b> | 0.089                                  | 0.178                                  | 0.294      | 1.627      | 0.802                      | 1.073                   | 1.134      |
| <b>5<sub>I</sub></b>  | 0.090                                  | 0.180                                  | 0.362      | 1.590      | 0.774                      | 1.083                   | 1.177      |

<sup>a</sup>  $\parallel$  is a symbol for C=C bond. The values of the  $\ddot{\text{E}}-\parallel$  column are the products of the first column multiplied by 2 ( $\text{WBI}_{(\ddot{\text{E}}-\parallel)} = \text{WBI}_{(\ddot{\text{E}}-\text{C}_{\text{DB}})} \times 2$ )

**Table 8** Calculated donor-acceptor energies for the most important interactions (the conventional statement for each donor and acceptor orbital is written in brackets) at UB3LYP/6-311++g\*\*.

|                       | LP(X)→LP*(B)<br>[n→p <sub>(B)</sub> ] | BD(C=C)→LP*(B)<br>[π→p <sub>(B)</sub> ] | BD(C=C)→LP*(Ē)<br>[π→p <sub>(Ē)</sub> ] | BD(B-C <sub>DB</sub> <sup>1</sup> )→LP*(Ē)<br>[σ→p <sub>(Ē)</sub> ] | BD(B-E)→LP*(B <sub>opp</sub> <sup>2</sup> )<br>[σ→p <sub>(B)</sub> ] |
|-----------------------|---------------------------------------|-----------------------------------------|-----------------------------------------|---------------------------------------------------------------------|----------------------------------------------------------------------|
| <b>1<sub>F</sub></b>  | 36.68                                 | 7.65                                    | 23.00                                   | 18.27                                                               | 94.41                                                                |
| <b>1<sub>Cl</sub></b> | 34.10                                 | 8.60                                    | 23.08                                   | 17.64                                                               | 100.25                                                               |
| <b>1<sub>Br</sub></b> | 29.63                                 | 8.94                                    | 21.87                                   | 17.1                                                                | 101.81                                                               |
| <b>2<sub>F</sub></b>  | 40.21                                 | 12.58                                   | 13.62                                   | 4.68                                                                | 15.63                                                                |
| <b>2<sub>Cl</sub></b> | 39.16                                 | 14.47                                   | 15.27                                   | 4.36                                                                | 17.58                                                                |
| <b>2<sub>Br</sub></b> | 34.73                                 | 15.07                                   | 14.11                                   | 3.99                                                                | 18.27                                                                |
| <b>3<sub>F</sub></b>  | 40.21                                 | 13.49                                   | 10.90                                   | 3.41                                                                | 13.95                                                                |
| <b>3<sub>Cl</sub></b> | 39.27                                 | 15.41                                   | 11.74                                   | 3.02                                                                | 15.70                                                                |
| <b>3<sub>Br</sub></b> | 35.18                                 | 15.94                                   | 11.65                                   | 2.78                                                                | 16.26                                                                |

<sup>1</sup> C<sub>DB</sub>=C<sub>Double Bond</sub>

<sup>2</sup> B<sub>opp</sub>=B<sub>opposite</sub>



**Table 9** Calculated contribution percentage for the estimation of  $\sigma$  and  $p$  atomic orbitals in the HOMO (and HOMO-1 anywhere needed) and LUMO of singlet BHEs ( $1_{s-X}$ ,  $2_{s-X}$ ,  $3_{s-X}$ ,  $4_{s-X}$  and  $5_{s-X}$  with X = H, F, Cl, Br and I) respectively, at UB3LYP/TZ2P.

| DS              | $E_{\text{HOMO-1}}$<br>kcal/mol | %SFO contribution<br>in HOMO-1 of $\ddot{\text{E}}$ | $E_{\text{HOMO}}$<br>kcal/mol | %SFO contribution<br>in HOMO of $\ddot{\text{E}}$ | $E_{\text{LUMO}}$<br>kcal/mol | %SFO contribution<br>in LUMO of $\ddot{\text{E}}$ |
|-----------------|---------------------------------|-----------------------------------------------------|-------------------------------|---------------------------------------------------|-------------------------------|---------------------------------------------------|
| $1_{\text{H}}$  | ---                             | ---                                                 | -166.976                      | 44.75% $p_x$ + 13.70% $s$                         | -60.905                       | 72.18% $p_z$                                      |
| $2_{\text{H}}$  | ---                             | ---                                                 | -155.832                      | 38.86% $p_x$ + 20.72% $s$                         | -49.282                       | 83.67% $p_z$                                      |
| $3_{\text{H}}$  | ---                             | ---                                                 | -153.473                      | 41.44% $p_x$ + 13.99% $s$                         | -51.614                       | 89.96% $p_z$                                      |
| $4_{\text{H}}$  | ---                             | ---                                                 | -143.942                      | 20.37% $p_x$ + 17.31% $s$ + 14.87% $p_z$          | -56.673                       | 54.78% $p_x$ + 38.13% $p_z$                       |
| $5_{\text{H}}$  | -138.131                        | 30.85% $p_x$ + 15.43% $s$                           | -137.695                      | 33.01% $p_y$                                      | -66.429                       | 77.12% $p_x$ + 15.66% $p_z$                       |
| $1_{\text{F}}$  | ---                             | ---                                                 | -171.090                      | 51.59% $p_x$ + 13.26% $s$                         | -79.439                       | 72.18% $p_z$                                      |
| $1_{\text{Cl}}$ | ---                             | ---                                                 | -171.279                      | 17.89% $p_x$ + 12.63% $s$                         | -75.407                       | 71.42% $p_z$                                      |
| $1_{\text{Br}}$ | ---                             | ---                                                 | -171.012                      | 44.28% $p_x$ + 11.35% $s$                         | -77.060                       | 70.11% $p_z$                                      |
| $1_{\text{I}}$  | ---                             | ---                                                 | -169.616                      | 28.53% $p_x$ + 6.34% $s$                          | -79.176                       | 69.13% $p_z$                                      |
| $2_{\text{F}}$  | ---                             | ---                                                 | -158.028                      | 40.98% $p_x$ + 19.70% $s$                         | -63.752                       | 80.94% $p_z$                                      |
| $2_{\text{Cl}}$ | ---                             | ---                                                 | -158.285                      | 35.78% $p_x$ + 17.67% $s$                         | -58.433                       | 81.74% $p_z$                                      |
| $2_{\text{Br}}$ | -158.877                        | 32.95% $p_x$ + 15.44% $s$                           | -158.414                      | 22.21% $p_y$                                      | -60.878                       | 79.32% $p_z$                                      |
| $2_{\text{I}}$  | -158.441                        | 21.74% $p_x$ + 9.55% $s$                            | -154.281                      | 15.52% $p_y$                                      | -63.548                       | 76.34% $p_z$                                      |
| $3_{\text{F}}$  | ---                             | ---                                                 | -157.152                      | 42.34% $p_x$ + 13.95% $s$                         | -64.854                       | 80.85% $p_z$                                      |
| $3_{\text{Cl}}$ | -156.228                        | 36.83% $p_x$ + 12.06% $s$                           | -154.827                      | 31.07% $p_y$                                      | -60.316                       | 81.09% $p_z$                                      |
| $3_{\text{Br}}$ | -157.163                        | 33.28% $p_x$ + 10.43% $s$                           | -155.277                      | 26.66% $p_y$                                      | -62.156                       | 80.16% $p_z$                                      |
| $3_{\text{I}}$  | -156.530                        | 22.74% $p_x$ + 6.98% $s$                            | -151.675                      | 19.95% $p_y$                                      | -64.789                       | 78.60% $p_z$                                      |
| $4_{\text{F}}$  | ---                             | ---                                                 | -146.184                      | 32.66% $p_x$ + 19.33% $s$                         | -69.991                       | 69.63% $p_z$ + 18.71% $p_x$                       |
| $4_{\text{Cl}}$ | -146.685                        | 31.76% $p_x$ + 16.51% $s$                           | -146.265                      | 28.10% $p_y$                                      | -65.513                       | 79.35% $p_z$ + 10.78% $p_x$                       |
| $4_{\text{Br}}$ | -147.888                        | 24.06% $p_x$ + 15.02% $s$                           | -147.465                      | 24.90% $p_y$                                      | -67.247                       | 58.88% $p_z$ + 30.50% $p_x$                       |
| $4_{\text{I}}$  | -150.457                        | 16.91% $p_x$ + 10.74% $s$                           | -145.889                      | 19.47% $p_y$                                      | -70.584                       | 59.63% $p_z$ + 30.80% $p_x$                       |
| $5_{\text{F}}$  | -144.031                        | 32.94% $p_x$ + 17.40% $s$                           | -142.490                      | 36.06% $p_y$                                      | -71.894                       | 71.71% $p_z$ + 18.98% $p_x$                       |
| $5_{\text{Cl}}$ | -144.185                        | 29.32% $p_x$ + 14.58% $s$                           | -141.474                      | 29.84% $p_y$                                      | -69.481                       | 70.65% $p_z$ + 21.06% $p_x$                       |
| $5_{\text{Br}}$ | -145.261                        | 27.82% $p_x$ + 13.35% $s$                           | -142.472                      | 27.39% $p_y$                                      | -71.103                       | 70.75% $p_z$ + 20.39% $p_x$                       |
| $5_{\text{I}}$  | -148.106                        | 19.74% $p_x$ + 9.97% $s$                            | -142.520                      | 21.73% $p_y$                                      | -74.605                       | 68.62% $p_z$ + 22.90% $p_x$                       |

**Table 10** Contribution (%) of s and p atomic orbital in the hybrid orbital of divalent atom (E) in its E-B bonding and in lone pair (LP) orbitals.

|                       | $\ddot{\text{E}}$ Hybrid orbital<br>in $\sigma_{\text{B}-\ddot{\text{E}}}$ bonds | Average hybrid for<br>$\ddot{\text{E}}$ in $\sigma_{\text{B}-\ddot{\text{E}}}$ bonds | $\ddot{\text{E}}$ Hybrid in<br>LP orbitals | Average hybrid for<br>$\ddot{\text{E}}$ in LP orbitals |
|-----------------------|----------------------------------------------------------------------------------|--------------------------------------------------------------------------------------|--------------------------------------------|--------------------------------------------------------|
| <b>1<sub>F</sub></b>  | $\text{sp}^{0.94}$                                                               |                                                                                      | ---                                        |                                                        |
| <b>1<sub>Cl</sub></b> | sp                                                                               | $\text{sp}^{0.99}$                                                                   | ---                                        |                                                        |
| <b>1<sub>Br</sub></b> | sp                                                                               |                                                                                      | ---                                        |                                                        |
| <b>1<sub>I</sub></b>  | sp                                                                               |                                                                                      | ---                                        |                                                        |
| <b>2<sub>F</sub></b>  | $\text{sp}^{8.42}$                                                               |                                                                                      | $\text{sp}^{0.27}$                         |                                                        |
| <b>2<sub>Cl</sub></b> | $\text{sp}^{7.3}$                                                                | $\text{sp}^{7.27}$                                                                   | $\text{sp}^{0.32}$                         | $\text{sp}^{0.32}$                                     |
| <b>2<sub>Br</sub></b> | $\text{sp}^{6.88}$                                                               |                                                                                      | $\text{sp}^{0.34}$                         |                                                        |
| <b>2<sub>I</sub></b>  | $\text{sp}^{6.47}$                                                               |                                                                                      | $\text{sp}^{0.36}$                         |                                                        |
| <b>3<sub>F</sub></b>  | $\text{sp}^{12.12}$                                                              |                                                                                      | $\text{sp}^{0.18}$                         |                                                        |
| <b>3<sub>Cl</sub></b> | $\text{sp}^{10.5}$                                                               | $\text{sp}^{10.42}$                                                                  | $\text{sp}^{0.21}$                         | $\text{sp}^{0.21}$                                     |
| <b>3<sub>Br</sub></b> | $\text{sp}^{9.8}$                                                                |                                                                                      | $\text{sp}^{0.22}$                         |                                                        |
| <b>3<sub>I</sub></b>  | $\text{sp}^{9.25}$                                                               |                                                                                      | $\text{sp}^{0.23}$                         |                                                        |
| <b>4<sub>F</sub></b>  | $\text{sp}^{12.69}$                                                              |                                                                                      | $\text{sp}^{0.17}$                         |                                                        |
| <b>4<sub>Cl</sub></b> | $\text{sp}^{11.06}$                                                              | $\text{sp}^{10.99}$                                                                  | $\text{sp}^{0.19}$                         | $\text{sp}^{0.19}$                                     |
| <b>4<sub>Br</sub></b> | $\text{sp}^{10.43}$                                                              |                                                                                      | $\text{sp}^{0.20}$                         |                                                        |
| <b>4<sub>I</sub></b>  | $\text{sp}^{9.79}$                                                               |                                                                                      | $\text{sp}^{0.21}$                         |                                                        |
| <b>5<sub>F</sub></b>  | ---                                                                              |                                                                                      | ---                                        |                                                        |
| <b>5<sub>Cl</sub></b> | $\text{sp}^{12.94}$                                                              | $\text{sp}^{12.16}$                                                                  | $\text{sp}^{0.16}$                         | $\text{sp}^{0.16}$                                     |
| <b>5<sub>Br</sub></b> | $\text{sp}^{12.16}$                                                              |                                                                                      | $\text{sp}^{0.17}$                         |                                                        |
| <b>5<sub>I</sub></b>  | $\text{sp}^{11.30}$                                                              |                                                                                      | $\text{sp}^{0.18}$                         |                                                        |

**Table 11** Calculated global electrophilicity ( $\omega$ ) and Nucleophilicity indices ( $N$ )<sup>a</sup> for the singlet state of all BHEs under study compared to their analogues NHEs.

| Compound                | Global Electrophilicity<br>$\omega$ (eV) |      | Nucleophilicity index ( $N$ )<br>HOMO(TCNE)=-9.42 eV |      |
|-------------------------|------------------------------------------|------|------------------------------------------------------|------|
|                         | BHEs                                     | NHEs | BHEs                                                 | NHEs |
| <b>1<sub>s-F</sub></b>  | 3.09                                     | 1.35 | 2.16                                                 | 1.82 |
| <b>1<sub>s-Cl</sub></b> | 3.03                                     | 2.27 | 2.11                                                 | 2.44 |
| <b>1<sub>s-Br</sub></b> | 3.11                                     | 3.06 | 2.11                                                 | 2.64 |
| <b>1<sub>s-I</sub></b>  | 3.14                                     | 3.52 | 2.24                                                 | 3.04 |
| <b>2<sub>s-F</sub></b>  | 2.52                                     | 1.70 | 2.67                                                 | 3.17 |
| <b>2<sub>s-Cl</sub></b> | 2.44                                     | 2.00 | 2.60                                                 | 3.32 |
| <b>2<sub>s-Br</sub></b> | 2.53                                     | 2.77 | 2.59                                                 | 3.41 |
| <b>2<sub>s-I</sub></b>  | 2.86                                     | 3.30 | 2.69                                                 | 3.58 |
| <b>3<sub>s-F</sub></b>  | 2.66                                     | 1.88 | 2.74                                                 | 3.53 |
| <b>3<sub>s-Cl</sub></b> | 2.63                                     | 1.90 | 2.71                                                 | 3.64 |
| <b>3<sub>s-Br</sub></b> | 2.60                                     | 2.51 | 2.79                                                 | 3.81 |
| <b>3<sub>s-I</sub></b>  | 2.73                                     | 3.13 | 2.90                                                 | 3.94 |
| <b>4<sub>s-F</sub></b>  | 2.85                                     | 2.09 | 3.13                                                 | 3.99 |
| <b>4<sub>s-Cl</sub></b> | 2.89                                     | 2.11 | 3.01                                                 | 4.03 |
| <b>4<sub>s-Br</sub></b> | 2.84                                     | 2.40 | 3.09                                                 | 4.10 |
| <b>4<sub>s-I</sub></b>  | 2.80                                     | 3.05 | 3.22                                                 | 4.29 |
| <b>5<sub>s-F</sub></b>  | 2.65                                     | 2.06 | 3.44                                                 | 4.31 |
| <b>5<sub>s-Cl</sub></b> | 2.74                                     | 2.10 | 3.29                                                 | 4.32 |
| <b>5<sub>s-Br</sub></b> | 2.71                                     | 2.28 | 3.34                                                 | 4.38 |
| <b>5<sub>s-I</sub></b>  | 1.09                                     | 2.95 | 1.20                                                 | 4.55 |

<sup>a</sup> The global Electrophilicity ( $\omega=\mu^2/2\eta$ ;  $\mu\approx(E_{\text{HOMO}}+E_{\text{LUMO}})/2$  &  $\eta=E_{\text{LUMO}}-E_{\text{HOMO}}$ ) and Nucleophilicity index ( $N=E_{\text{HOMO(Nu)}}-E_{\text{HOMO(TCNE)}}$ ; Tetracyanoethylene (TCNE) is chosen as the reference) [1] for all of the halogenated species are probed.  $\mu$  is the chemical potential and  $\eta$  is the chemical hardness.

**Table 12** Selected bond lengths in Å, bond angles and dihedral angles (**D1**) in Degree (°), wiberg bond indices (WBI), donor-acceptor energies, and formation energies in kcal/mol for the adducts (complexes) of **1<sub>X</sub>**-, **2<sub>X</sub>**- and **3<sub>X</sub>**-**MCl** (with X =F, Cl; M=Cu, Ag, Au) at UB3LYP/TZ2P.

|                            | M-Ė  | B-Ė  | WBI   |       |       | D1   | ∠Ė-M-Cl | ΔE <sub>Complex</sub> | Donor-acceptor energies |              |
|----------------------------|------|------|-------|-------|-------|------|---------|-----------------------|-------------------------|--------------|
|                            |      |      | M-Ė   | B-Ė   | Ė—l   |      |         |                       | π(C=C)→p(Ė)             | LP(M)→LP*(Ė) |
| <b>1<sub>F</sub></b>       |      | 1.53 |       | 1.107 | 0.498 | 51.7 |         |                       | 18.09                   |              |
| <b>1<sub>F</sub>-CuCl</b>  | 1.85 | 1.57 | 0.406 | 0.973 | 0.106 | 46.5 | 177.42  | -49.89                | 7.18                    | 20.33        |
| <b>1<sub>F</sub>-AgCl</b>  | 2.17 | 1.55 | 0.283 | 0.999 | 0.106 | 51.1 | 179.21  | -32.50                | 5.64                    | 9.89         |
| <b>1<sub>F</sub>-AuCl</b>  | 1.94 | 1.58 | 0.745 | 0.930 | 0.093 | 40.5 | 171.29  | -66.01                | 18.98                   | 53.62        |
| <b>2<sub>F</sub></b>       |      | 2.04 |       | 0.959 | 0.394 | 55.7 |         |                       | 8.60                    |              |
| <b>2<sub>F</sub>-CuCl</b>  | 2.27 | 2.03 | 0.552 | 0.959 | 0.106 | 44.7 | 178.58  | -35.45                | 7.07                    | 7.09         |
| <b>2<sub>F</sub>-AgCl</b>  | 2.51 | 2.03 | 0.474 | 0.962 | 0.093 | 46.7 | 177.30  | -26.29                | 29.14                   | 5.82         |
| <b>2<sub>F</sub>-AuCl</b>  | 2.32 | 2.03 | 0.814 | 0.946 | 0.108 | 39.9 | 179.69  | -55.41                | 8.54                    | 18.35        |
| <b>3<sub>F</sub></b>       |      | 2.14 |       | 0.942 | 0.308 | 56.3 |         |                       | 6.63                    |              |
| <b>3<sub>F</sub>-CuCl</b>  | 2.34 | 2.11 | 0.520 | 0.943 | 0.093 | 44.0 | 178.69  | -31.37                | 30.07                   | 5.78         |
| <b>3<sub>F</sub>-AgCl</b>  | 2.57 | 2.12 | 0.447 | 0.945 | 0.108 | 45.8 | 177.74  | -23.40                | 10.28                   | 4.96         |
| <b>3<sub>F</sub>-AuCl</b>  | 2.39 | 2.11 | 0.756 | 0.929 | 0.125 | 39.1 | 179.37  | -49.38                | 8.28                    | 14.57        |
| <b>1<sub>Cl</sub></b>      |      | 1.52 |       | 1.141 | 0.496 | 52.9 |         |                       | 12.56                   |              |
| <b>1<sub>Cl</sub>-CuCl</b> | 1.86 | 1.56 | 0.366 | 1.001 | 0.108 | 49.0 | 177.83  | -49.01                | 5.90                    | 18.56        |
| <b>1<sub>Cl</sub>-AgCl</b> | 2.18 | 1.55 | 0.256 | 1.028 | 0.125 | 52.8 | 179.16  | -32.06                | 4.51                    | 9.3          |
| <b>1<sub>Cl</sub>-AuCl</b> | 1.95 | 1.57 | 0.696 | 0.957 | 0.108 | 43.9 | 172.58  | -64.43                | 13.56                   | 49.45        |
| <b>2<sub>Cl</sub></b>      |      | 2.04 |       | 0.913 | 0.400 | 58.4 |         |                       | 7.11                    |              |
| <b>2<sub>Cl</sub>-CuCl</b> | 2.27 | 2.02 | 0.536 | 0.936 | 0.125 | 48.5 | 178.67  | -34.63                | 5.85                    | 6.84         |
| <b>2<sub>Cl</sub>-AgCl</b> | 2.51 | 2.02 | 0.459 | 0.938 | 0.108 | 50.3 | 177.48  | -25.66                | 29.77                   | 5.67         |
| <b>2<sub>Cl</sub>-AuCl</b> | 2.33 | 2.02 | 0.797 | 0.924 | 0.157 | 44.1 | 179.84  | -54.27                | 12.21                   | 17.58        |
| <b>3<sub>Cl</sub></b>      |      | 2.13 |       | 0.893 | 0.298 | 59.4 |         |                       | 11.43                   |              |
| <b>3<sub>Cl</sub>-CuCl</b> | 2.34 | 2.10 | 0.508 | 0.914 | 0.108 | 48.4 | 178.75  | -30.43                | 30.27                   | 5.53         |
| <b>3<sub>Cl</sub>-AgCl</b> | 2.58 | 2.11 | 0.435 | 0.915 | 0.157 | 50.0 | 177.76  | -22.40                | 13.51                   | 4.81         |
| <b>3<sub>Cl</sub>-AuCl</b> | 2.40 | 2.10 | 0.745 | 0.903 | 0.147 | 43.9 | 179.46  | -48.19                | 13.66                   | 14           |

**Fig. 1** Energies of bis(boryl)-based divalents as a function of their dihedral angle D1( $\angle$ C-B-E-B) for puckered singlets ( $3s_X$ , with the minimum at  $\sim 60^\circ$ ), at UB3LYP/TZ2P.

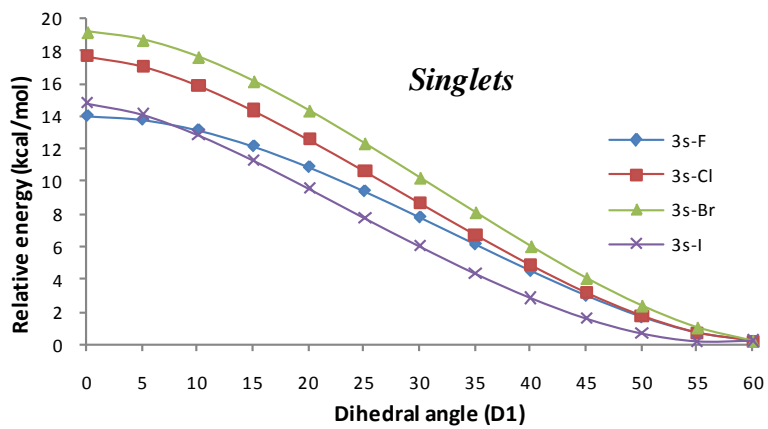

**Fig. 2**  $\Delta E_{(t-s)}$  vs. atomic volume for halogenated BHEs at B3LYP/6-311++g\*\*.

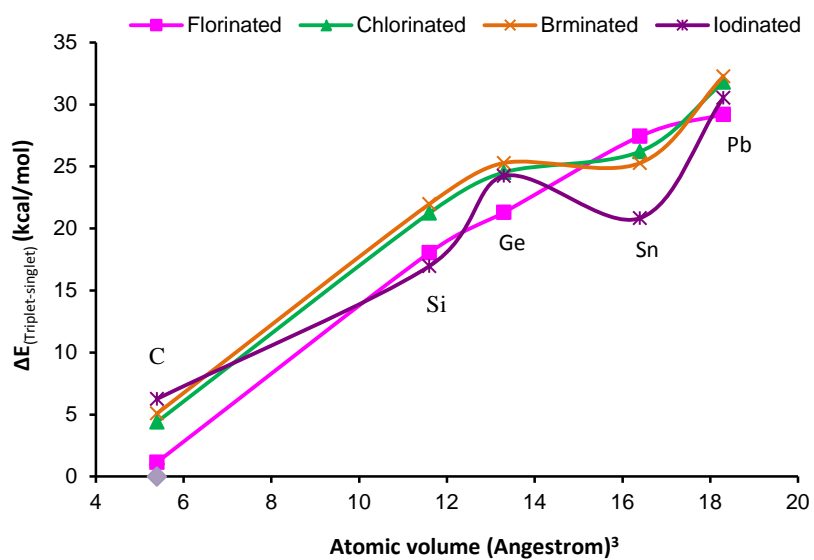

**Fig. 3** Linear relationships between singlet LUMO–HOMO energy gaps  $\Delta E_{(\text{LUMO-HOMO})}$ , and their corresponding singlet–triplet energy separations ( $\Delta E_{\text{st}}$ ), for the two series of halogenated five-membered-rings:  $3_{\text{s-X}}$  and  $5_{\text{s-X}}$ ; with correlation factors: 0.918 and 0.924, respectively

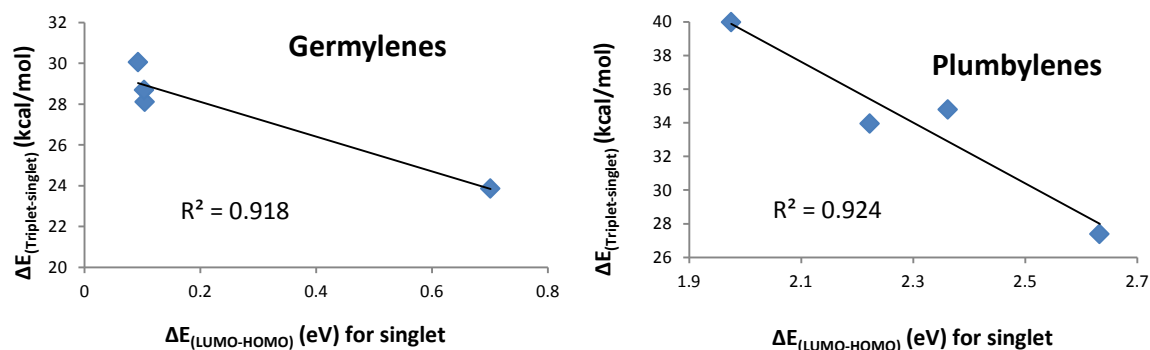

**Fig. 4** Linear relationships between the B-E-B angles and their corresponding halogen atom radius, for the five-membered-rings:  $2_{\text{s-X}}$  (a),  $3_{\text{s-X}}$  (b),  $4_{\text{s-X}}$  (c),  $5_{\text{s-X}}$  (d); with correlation factors: 0.844, 0.703, 0.970 and 0.990, respectively

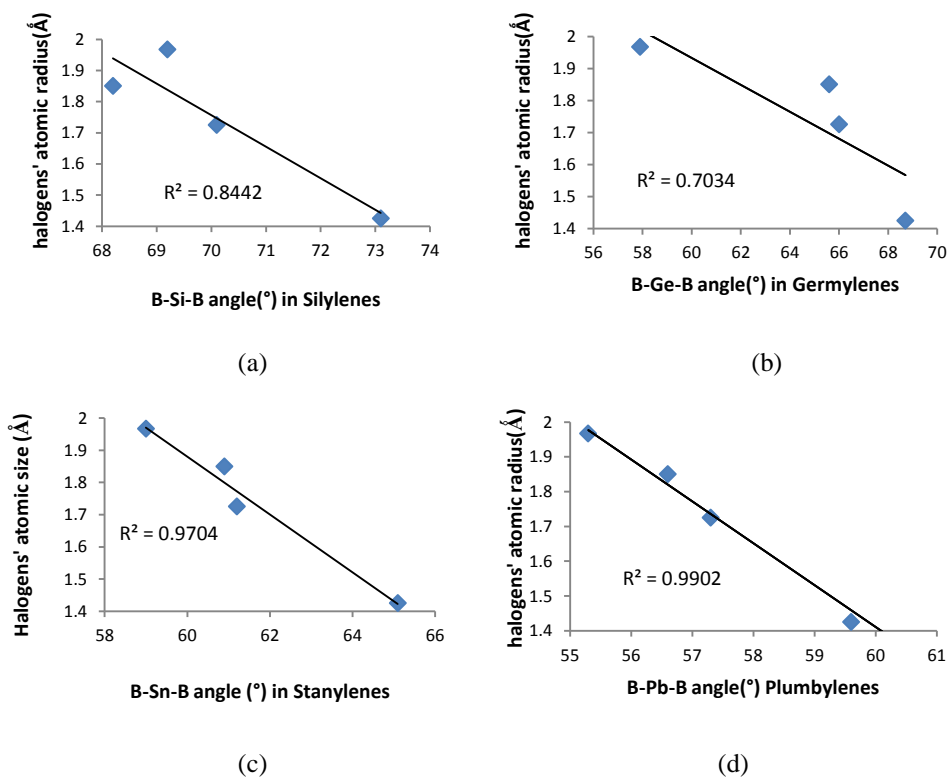

**Fig. 5** Graphs showing relative energies for the interaction of Lewis base ( $\text{PH}_3$ ) to (a)  $2_{s\text{-Cl}}$  and (b)  $2_{t\text{-Cl}}$ .

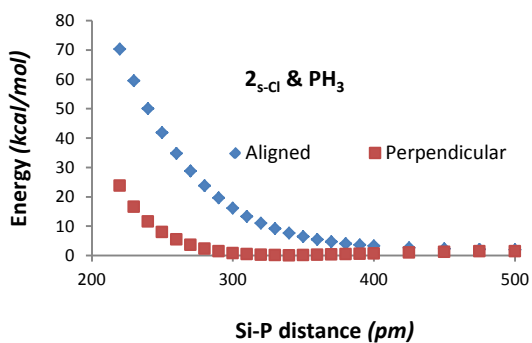

(a)

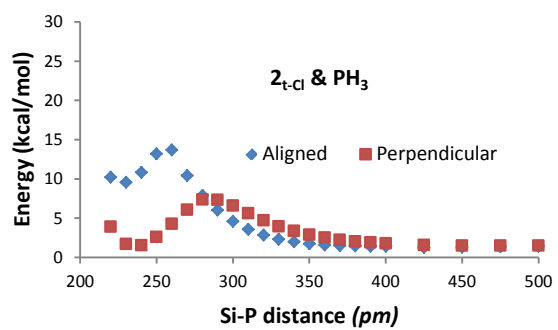

(b)

**Fig. 6** Correlation diagrams showing high correlation between the relative energies of the reactions (Scheme 4, Table 8S) and  $\Delta E_{\text{st}}$

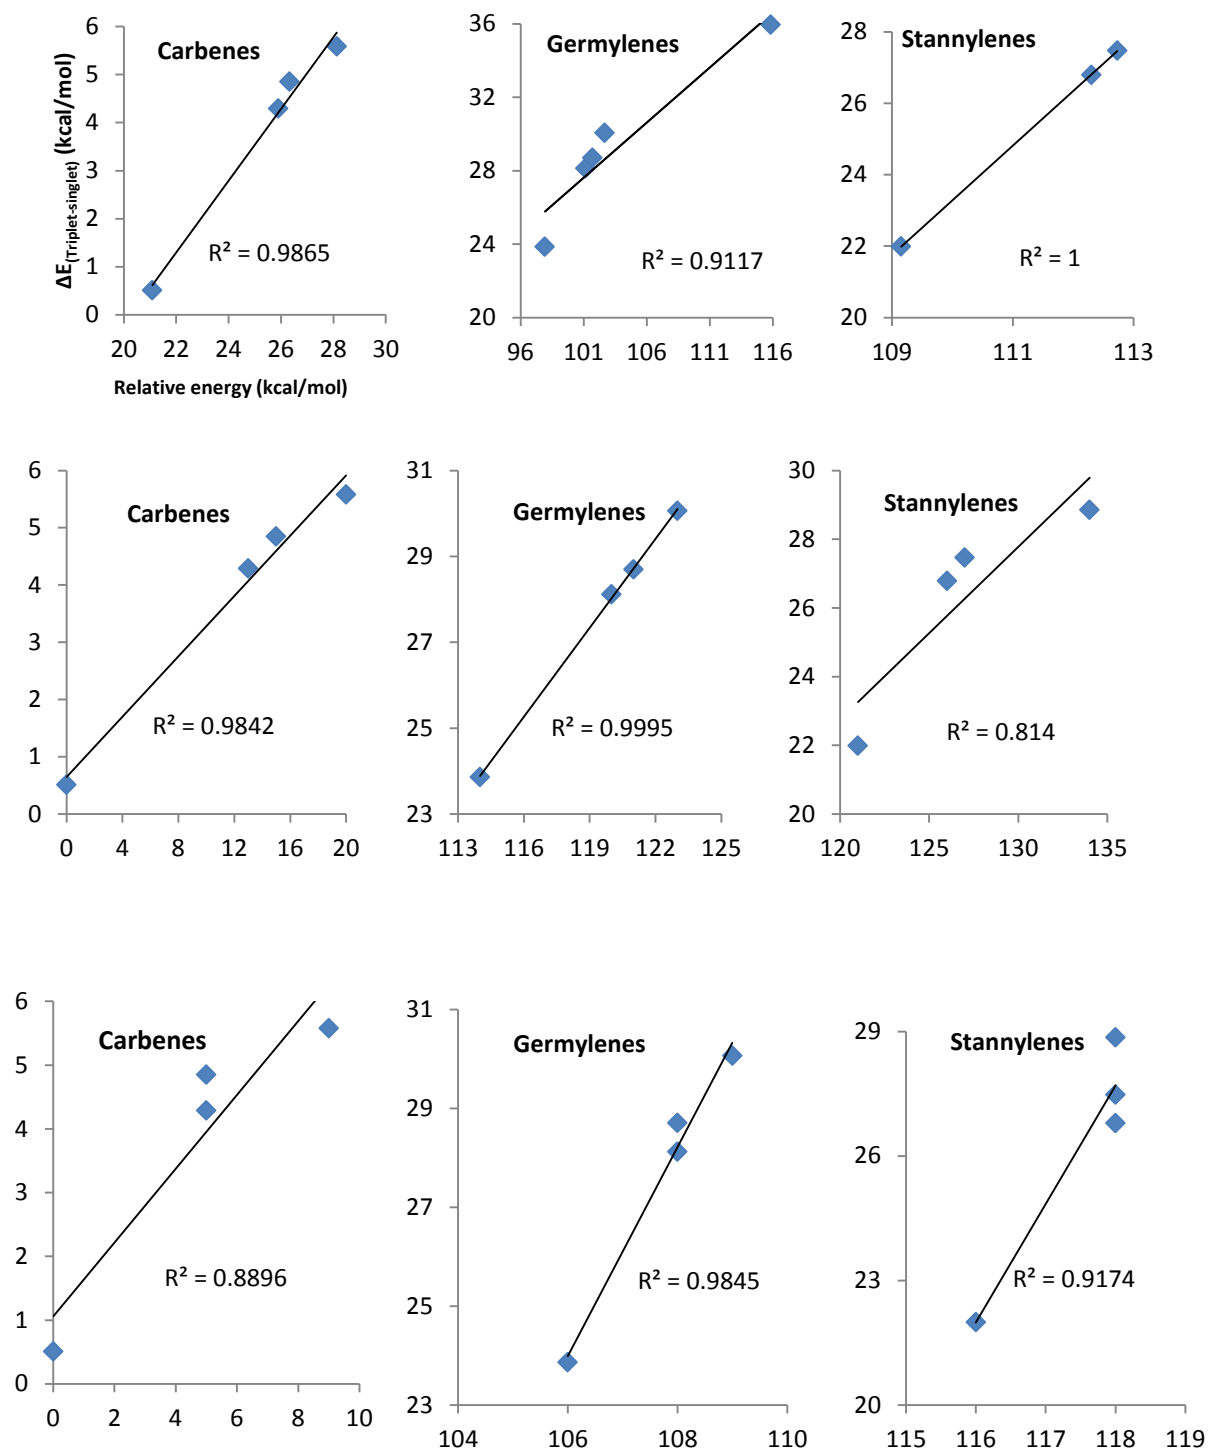



[1] Kassae MZ, Momeni MR, Shakib FA, Najafi Z, Zandi H (2011) J Phys Org

Chem 24:1022
